# Supplementary material
Source: publisher site journal article supplement (https://www.dovepress.com/article/265674)

**Clinical features and C-Reactive Protein as predictors of bacterial exacerbations of COPD:  
Supplementary Material**

**Figure S1: Association between sputum color and number of bacterial or viral/atypical pathogens isolated**

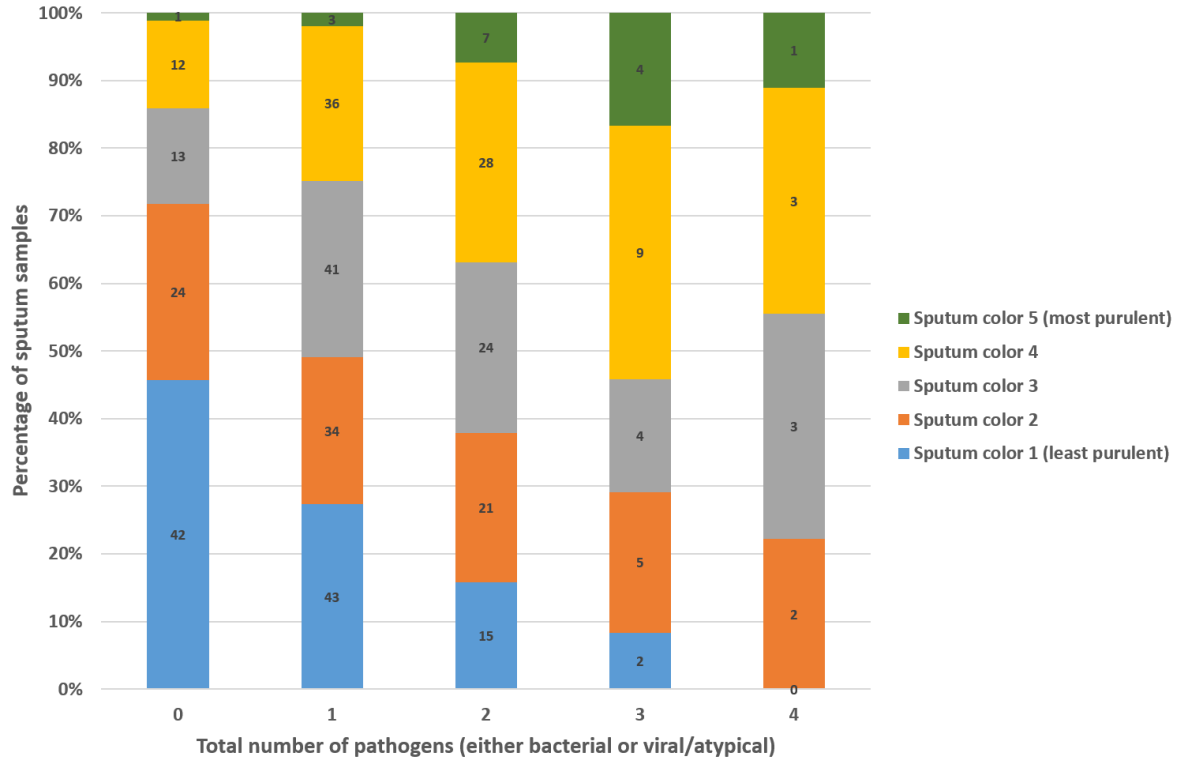

**Figure S2: Association between sputum color and number of viral/atypical pathogens isolated**

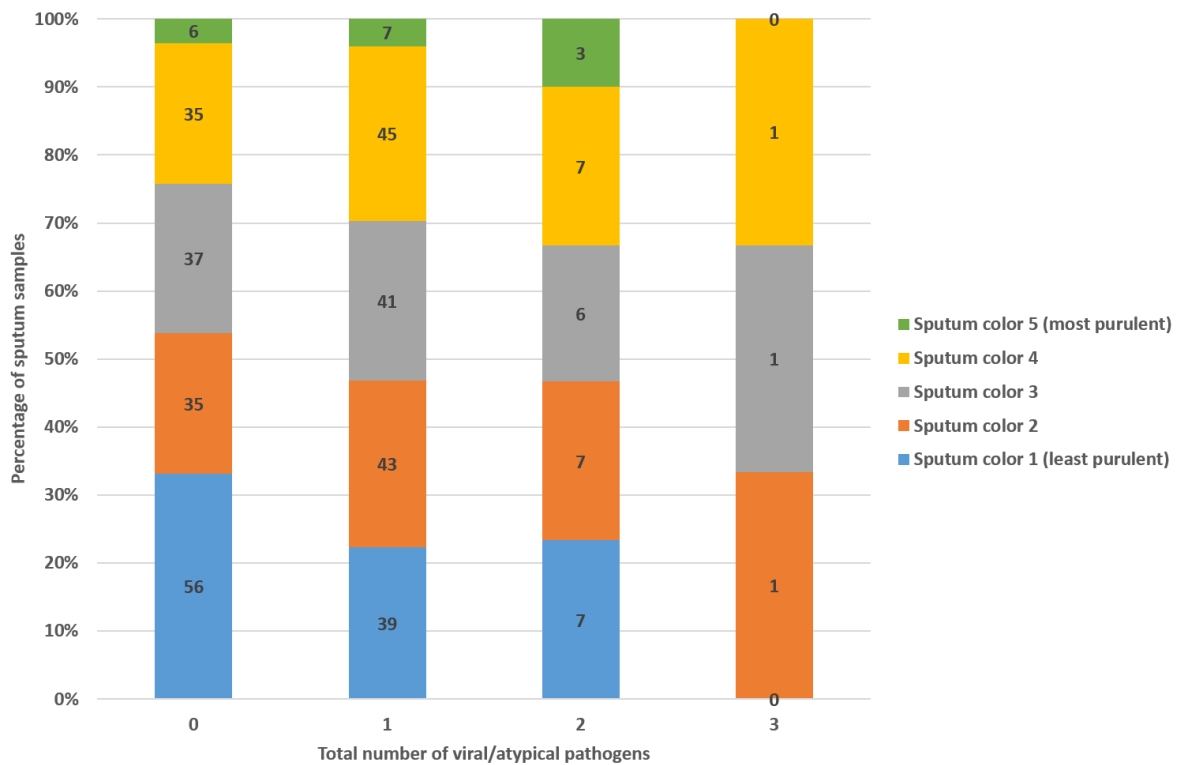

**Figure S3: Association between sputum color and CRP category**

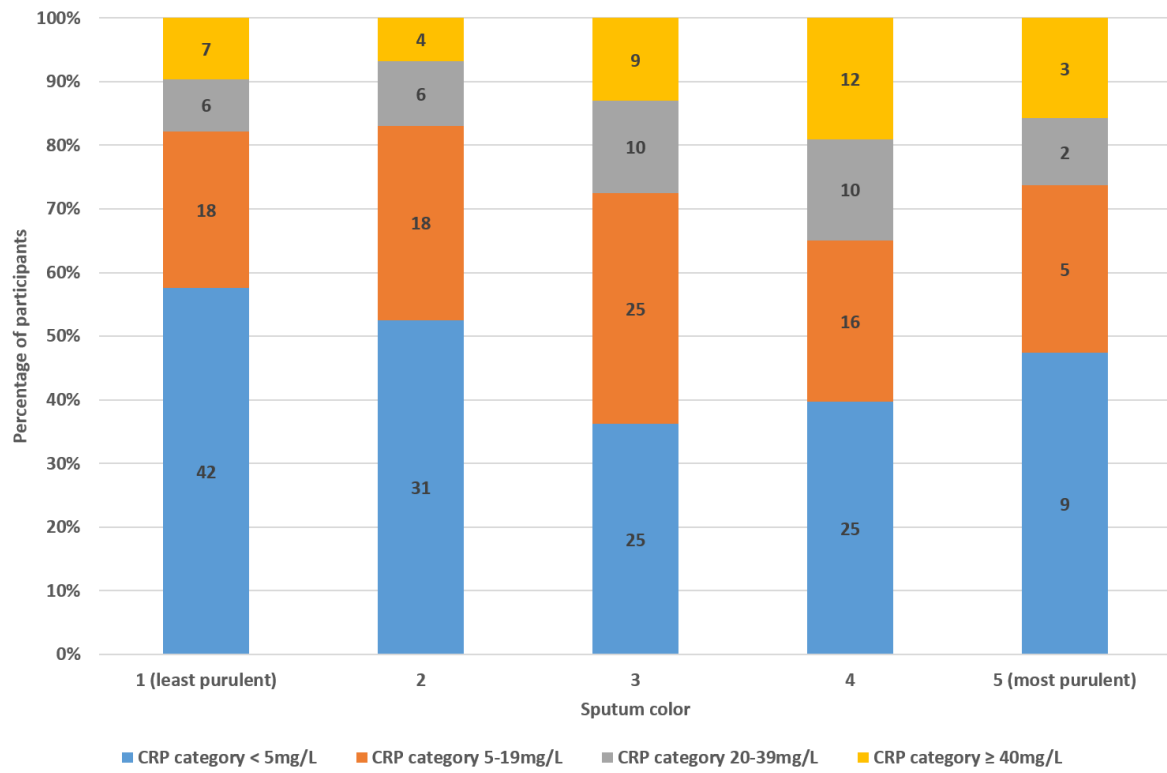

Supplement: Supplementary file 1 [file get_supplementary_file.php]
